# Supplementary material
Source: ML conference proceedings conference paper supplement (https://openreview.net/forum?id=EFV7fLZRWO)
Supplement: supplementary_material [file attachment]

## 549 **A Appendix**

### 550 **A.1 Dataset Information**

551 **Dataset access and maintenance plan** The *MinT* dataset will be provided via the persistent long-  
552 term storage service RADAR4KIT (Research Data Repository for KIT), ensuring both uninterrupted  
553 and machine readable access. Data published by *RADAR4KIT* is indexed via Metadata following  
554 the *Open Archive Initiative* interface which is automatically published to datacite.org and will  
555 automatically be referable via a DOI. Data is secured according to *Open Archival Information System*  
556 standard ISO 14721:2003 and availability is guaranteed for a minimum of 10 years.

557 To facilitate the review process and integrate reviewer feedback concerning the data structure  
558 (RADAR4KIT data can not be changed easily), we provide an intermediate link for direct download  
559 of our data, which will be exchanged with a RADAR4KIT link for the camera ready version.

560 **Currently the dataset can be downloaded under this link (2.2 GB, compressed tar file):**

561 <https://s.kit.edu/mint-data>

562 Our code for motion to muscle estimation can be found here:

563 <https://github.com/simplexsgil/motion2muscle.git>

564 **License** The MinT dataset is build on top of the KIT Whole-Body Human Motion Database,  
565 BMLmovi, BMLrub, the EyesJapan dataset and TotalCapture. We make use of AMASS to map from  
566 the motions of these original datasets to virtual marker positions in OpenSim.

567 All of these datasets allow usage of their data for non-commercial scientific research:

- 568 • The license of AMASS can be found under <https://amass.is.tue.mpg.de/license.html>
- 569 • The License of BMLmovi and BMLrub can be found under  
570 <https://www.biomotionlab.ca/movi/>
- 571 • The KIT Whole-Body Human Motion Database can be used upon citation of the original  
572 work as explained here <https://download.is.tue.mpg.de/amass/licences/kit.html>
- 573 • The license for the EyesJapan dataset can be found under  
574 [http://mocapdata.com/Terms\\_of\\_Use.html](http://mocapdata.com/Terms_of_Use.html)
- 575 • The license for the Total Capture dataset can be found under  
576 <https://cvssp.org/data/totalcapture/>

577 The Muscles in Time dataset will be published under a CC BY-NC 4.0 license as defined under  
578 <https://creativecommons.org/licenses/by-nc/4.0/>. Researchers making use of this dataset must also  
579 agree to the licenses mentioned above which can add additional restrictions depending on the  
580 individual sub-dataset.

581 Our data generation pipeline is licensed under Apache License Version 2.0 as defined under  
582 <https://apache.org/licenses/LICENSE-2.0>.

583 Code for training our muscle activation estimation networks is licensed under the MIT license as  
584 defined under <https://opensource.org/license/mit>.

585 **Author statement** The authors of this work bear the responsibility for publishing the MinT dataset  
586 and related code and data.

587 **Data structure** The structure of the provided MinT data is intentionally kept simple. All data is  
588 saved in CSV files or pandas DataFrames stored in pickle files. In Listing 1 we display how data for  
589 an individual sample can be loaded with minimal dependencies (*joblib* and *pandas*). We provide  
590 muscle activations in a range of  $[0, 1]$ , ground reaction forces and effective muscle forces. Data  
591 is provided with 50 fps, each dataframe is indexed by fractional timestamps. Columns are named  
592 meaningfully, the first 80 muscles belong to the lower body model, the following 322 muscles belong

593 to the upper body model. The first and last 0.14 seconds are cut off since the muscle activation  
 594 analysis is unstable towards the beginning and end of data. Since the data is generated in chunks of  
 595 1.4 seconds and muscle activation analysis can fail to succeed due to various factors, the provided  
 596 data may contain gaps identified by missing data for certain time ranges.

```

1 >>> # First download and extract the dataset.
2 >>> # Example for sample
3 >>> #'BMLmovi/BMLmovi/Subject_11_F_MoSh/Subject_11_F_10_poses'
4 >>> import joblib
5 >>> joblib.load("muscle_activations.pkl")
6         LU_addbrev_l      ...      TL_TR4_r      TL_TR5_r
7 0.14          0.016      ...      0.003      0.061
8 0.16          0.028      ...      0.005      0.070
9 0.18          0.033      ...      0.002      0.080
10 ...          ...      ...      ...      ...
11 3.74          0.024      ...      0.020      0.028
12 3.76          0.016      ...      0.009      0.004
13 3.78          0.011      ...      0.003      0.000
14
15 [183 rows x 402 columns]
16
17 >>> joblib.load("grf.pkl")
18         ground_force_right_vx      ...      ground_torque_left_z
19 0.14          15.962      ...      0.0
20 0.16          10.596      ...      0.0
21 0.18          3.422      ...      0.0
22 ...          ...      ...      ...
23 3.72          20.337      ...      0.0
24 3.74          21.572      ...      0.0
25 3.76          22.546      ...      0.0
26
27 [182 rows x 18 columns]
28
29 >>> joblib.load("muscle_forces.pkl")
30         LU_addbrev_l      ...      TL_TR4_r      TL_TR5_r
31 0.14          8.430      ...      0.153      11.652
32 0.16          15.345      ...      0.283      13.240
33 0.18          19.127      ...      0.143      15.240
34 ...          ...      ...      ...      ...
35 3.72          14.437      ...      1.320      3.661
36 3.74          13.993      ...      1.270      5.330
37 3.76          9.346      ...      0.577      0.847
38
39 [182 rows x 402 columns]

```

Listing 1: Simplified loading of MinT samples with joblib and pandas.

597 **The *musint* package** To further facilitate the usage of the MinT dataset, we provide the *musint*  
 598 package, a Python package that allows data to be loaded into a predefined torch dataset and allows  
 599 simplified cross-referencing with BABEL dataset labels. Additionally, it includes functionality for  
 600 sampling a sub-window of the data at a given framerate as well as identifying and handling any gaps  
 601 in the data. A short example on the *musint* package usage is displayed in Listing 2.

602 The *musint* package can be installed via `pip install musint`. Additional insight can be found on  
 603 the *musint* github page where we also provide a Jupyter notebook for displaying the data as well as

604 additional information on muscle subsets:  
605 <https://github.com/simplexsigil/MusclesInTime>

```
1 >>> # First download and extract the dataset.
2 >>> import os
3 >>> from musint.datasets.mint_dataset import MintDataset
4
5 >>> md = MintDataset(os.path.expandvars("$MINT_ROOT"))
6
7 >>> md.by_path("TotalCapture/TotalCapture/s1/acting2_poses")
8 MintData(path_id='s1/acting2', babel_sid=12906, dataset='
  TotalCapture', amass_dur=61.7, num_frames=1114, fps=50.0,
  analysed_dur=22.26, analysed_percentage=0.36, data_path='
  TotalCapture/TotalCapture/s1/acting2_poses', weight=72.1,
  height=169.2, subject='s1', sequence='acting2_poses',
  gender='male', has_gap=False, dtype=object))
9
10 >>> md.by_path("TotalCapture/TotalCapture/s1/acting2_poses").
  get_muscle_activations(time_window=(0.3,1.),
  target_frame_count=int(0.7*20.))
11      LU_addbrev_l ...   TL_TR4_r   TL_TR5_r
12 0.30           0.094 ...   0.000   0.020
13 0.36           0.094 ...   0.003   0.042
14 0.40           0.091 ...   0.000   0.027
15 ...           ... ...   ...   ...
16 0.90           0.093 ...   0.000   0.008
17 0.94           0.093 ...   0.000   0.000
18 1.00           0.094 ...   0.001   0.009
19
20 [14 rows x 402 columns]
```

Listing 2: Loading the MinT dataset with the python musint package.

## 606 A.2 Additional statistics and information

607 In Figure 9 we provide additional information on the data analyzed provided with Muscles in Time.  
608 Total Capture makes up a small part of the dataset with exceptionally long sequences. The Eyes Japan  
609 Dataset provides the largest contribution with 3.2h of analyzed recordings.

610 In Tables 3 and 4, we list larger muscle groups in the lower and upper body model as well as their  
611 function for human motion. Muscle groups or larger muscles can be represented by multiple simulated  
612 muscles, e.g. since such muscles are attached to multiple muscle locations or exert forces in varying  
613 directions. The *Gluteus Medius* muscle is an example with three simulated activations on each side  
614 of the body.

## 615 A.3 Design choices and more detailed limitations

616 The muscle-driven simulation, based on the approach by Falisse *et al.* [18], aims to ensure that muscle  
617 and skeletal dynamics align closely with given kinematic data while minimizing muscle effort. This  
618 process involves finding a solution within the problem space that satisfies an error tolerance and the  
619 number of collocation points, which depend on the dynamics of the kinematic data. Collocation  
620 points are used to discretize the continuous kinematic and dynamic equations into a finite set of points,  
621 making the optimization problem computationally feasible. To mitigate the risk of nonconvergent  
622 or nonmeaningful solutions, we implemented safeguards by restricting the deviation between the  
623 kinematic information before and after the optimization problem converges.

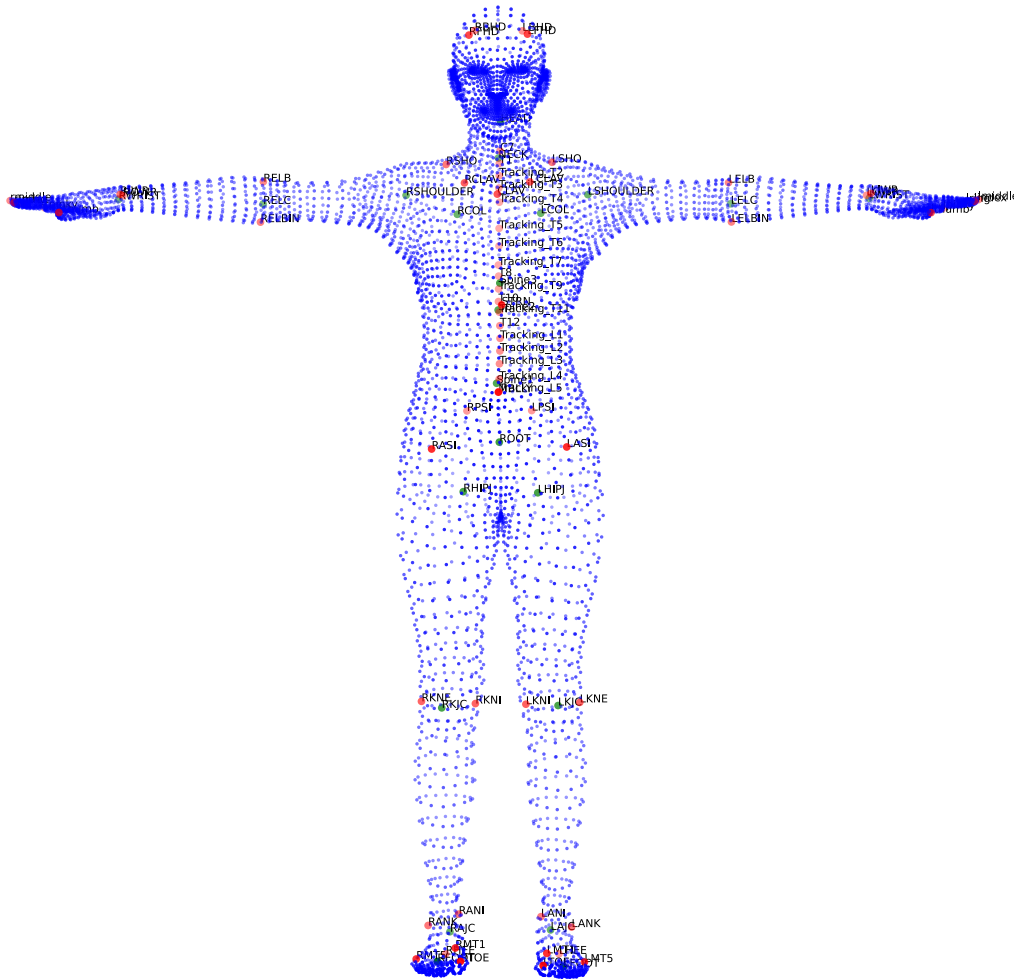

Figure 7: Virtual marker placement for transferring motions to OpenSim, enlarged from Figure 2.

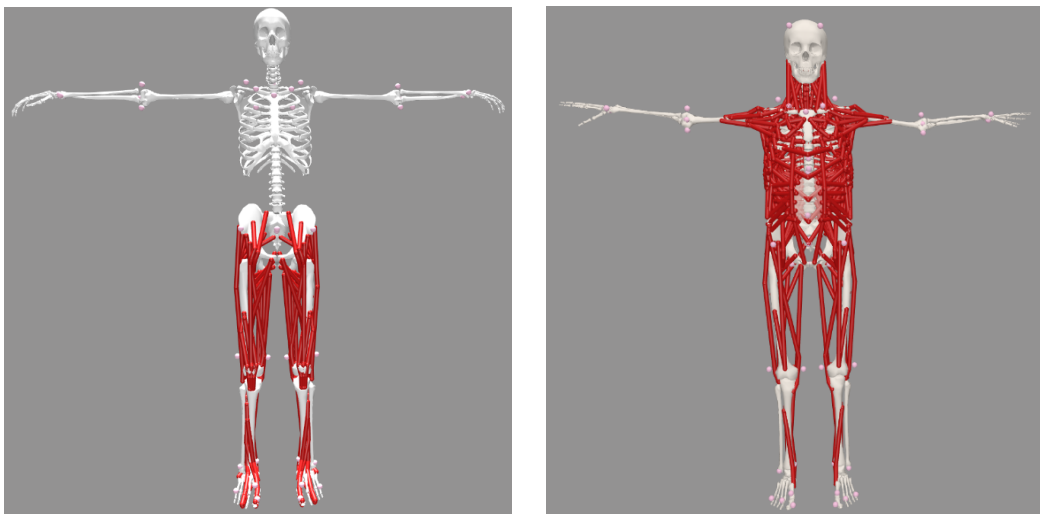

Figure 8: Lower body and upper body model, enlarged from Figure 2.

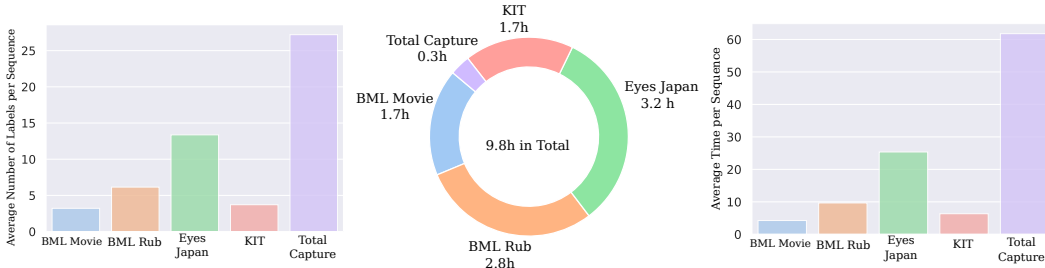

Figure 9: Average number of labels per sequence, composition of sub datasets and average sequence length.

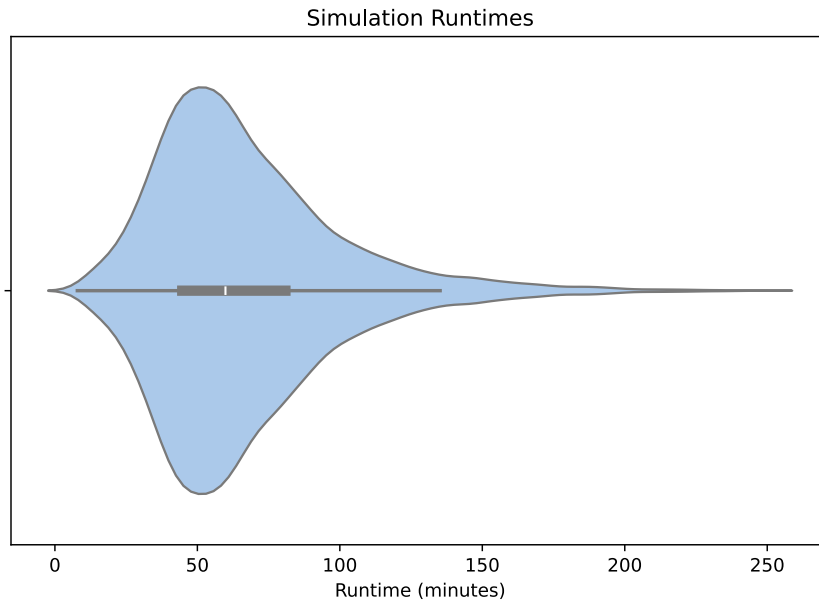

Figure 10: Analysis runtime distribution of the optimal trajectory problem described by Falisse *et al.* [18]. Subset of 10k runs.

624 Given the computational complexity, we decided to use 50 collocation points per second and an  
 625 error tolerance of  $10^{-3}$ . On an Intel Xeon Gold 6230 with 96 GB RAM, processing 6 subsequences  
 626 of 1.68 seconds (including 0.14 second buffers at start and end) in parallel took approximately a  
 627 median time of 45 minutes. Figure 10 displays a distribution of sample-wise runtimes in a violin  
 628 plot. Non-converging samples tend to have higher runtimes and can be found on the long tail on  
 629 the right. To manage the impact of unsuccessful simulations on the overall runtime, we limited the  
 630 optimization problem to 2500 iterations and discard a sample if the optimization does not fall within  
 631 error tolerance after this time. The AMASS sequences were divided into 1.4-second segments to  
 632 mitigate a nonlinearly increasing runtime associated with longer motion sequences. After simulation,  
 633 these segments were recombined into the original sequences, with muscle values smoothed at the  
 634 connection points to ensure seamless transitions.

635 A challenge arose from minor variable distances between the AMASS body model and the ground,  
 636 since the contact spheres provided by the OpenCap simulation are susceptible to changes in foot-  
 637 ground distance. To provide similar foot-ground distances over all AMASS subjects, our pipeline  
 638 automatically offsets the AMASS model depending on the lowest body marker over the time of the  
 639 sequence.

Table 3: List of muscle groups modelled in the model by Lai et al. [33], which are analysed in the presented approach, and their functions [74].

| <b>Muscle</b>             | <b>Function</b>                                                           |
|---------------------------|---------------------------------------------------------------------------|
| Gluteus Maximus           | Extension and rotation of the hip.                                        |
| Gluteus Medius            | Abduction and rotation of the thigh.                                      |
| Gluteus Minimus           | Abduction and rotation of the thigh.                                      |
| Adductor Brevis           | Adduction, flexion, and rotation of the thigh.                            |
| Adductor Longus           | Adduction and flexion of the thigh.                                       |
| Adductor Magnus           | Adduction, flexion and rotation of the thigh.                             |
| Gracilis                  | Adduction, flexion and rotation of the thigh.                             |
| Semitendinosus            | Flexion and rotation of the knee, as well as extension of the hip.        |
| Semimembranosus           | Flexion and rotation of the knee, as well as extension of the hip.        |
| Tensor Fasciae Latae      | Abduction and rotation of the thigh, as well stabilisation of the pelvis. |
| Piriformis                | Rotation and extension of the thigh and abduction of thigh.               |
| Sartorius                 | Flexion, abduction, and rotation of the hip and flexion of the knee.      |
| Iliacus                   | Flexion of the hip.                                                       |
| Psoas                     | Flexion and rotation of the hip.                                          |
| Rectus Femoris            | Flexion of hip and extension of knee.                                     |
| Biceps Femoris            | Flexion of knee and extension of hip.                                     |
| Medial Gastrocnemius      | Flexion of foot and flexion of knee.                                      |
| Lateral Gastrocnemius     | Plantar flexion and knee flexion.                                         |
| Tibialis Anterior         | Dorsiflexion and inversion of the foot.                                   |
| Vastus                    | Extension of the knee.                                                    |
| Extensor Digitorum Longus | Extension of toes and dorsiflexion of the foot.                           |
| Extensor Hallucis Longus  | Extension of the big toe and dorsiflexion of the foot.                    |
| Flexor Digitorum Longus   | Flexion of toes, as well as plantar flexion and inversion of the foot.    |
| Flexor Hallucis Longus    | Flexion of toes, as well as plantar flexion and inversion of the foot.    |
| Peroneus (Fibularis)      | Plantar flexion and eversion of the foot.                                 |
| Soleus                    | Plantar flexion of the foot.                                              |

640 Mapping AMASS motions to OpenSim models presented difficulties due to the numerous degrees  
641 of freedom in the Thoracolumbar model, complicating kinematic analysis. To safeguard the ver-  
642 tebral joints against aberrant movements, we constrained the range of motion for each vertebra,  
643 approximating the natural degrees of freedom in the vertebrae joints.

644 The MinT dataset was restricted to motions involving foot-ground contact only. Motions involving  
645 ground contact of other body parts or involving objects were excluded, except for motions that  
646 included throwing and lifting, which are particularly relevant for analyzing back muscle activation. In

Table 4: List of muscle groups modelled in the model by Bruno et al. [3], which are analysed in the presented approach, and their functions [74].

| Muscle                | Function                                                     |
|-----------------------|--------------------------------------------------------------|
| Longissimus           | Extension and rotation of the vertebrae.                     |
| Iliocostalis          | Extension and flexion of the neck.                           |
| Semispinalis          | Extension and rotation of the vertebrae.                     |
| Splenius              | Extension and rotation of the vertebrae.                     |
| Sternocleidomastoid   | Flexion and rotation of the head.                            |
| Scalenus              | Elevation of ribs and flexion of the neck.                   |
| Longus Colli          | Flexion of the neck and stabilisation of the cervical spine. |
| Levator Scapulae      | Elevation and adduction of the scapula.                      |
| Quadratus Lumborum    | Flexion the vertebral column.                                |
| Multifidus            | Stabilisation cervical vertebrae.                            |
| Rectus Abdominis      | Flexion of the lumbar spine.                                 |
| External Oblique      | Flexion and rotation of the trunk.                           |
| Internal Oblique      | Flexion and rotation of the trunk.                           |
| Transversus Abdominus | Stabilisation of the trunk.                                  |

647 these cases, we assumed the objects’ mass to be negligible, as the AMASS dataset does not provide  
648 this information.

#### 649 A.4 Results for additional muscle subsets

650 To facilitate comparability to real world recordings as well as to other datasets, we define two muscle  
651 subsets of the lower body model, containing either 16 or eight of the most important lower body  
652 muscles for human locomotion. The subset LAI\_ARNOLD\_LOWER\_BODY\_16 contains *left gluteus*  
653 *medius 1, left adductor magnus ischial part, left gluteus maximus 2, left iliacus, left rectus femoris,*  
654 *left biceps femoris long head, left gastrocnemius medial head, left tibialis anterior, right gluteus*  
655 *medius 1, right adductor magnus ischial part, right gluteus maximus 2, right iliacus, right rectus*  
656 *femoris, right biceps femoris long head, right gastrocnemius medial head and right tibialis anterior*  
657 while the muscle subset LAI\_ARNOLD\_LOWER\_BODY\_8 contains *left gluteus medius 1, left gluteus*  
658 *maximus 2, left rectus femoris, left biceps femoris long head, right gluteus medius 1, right gluteus*  
659 *maximus 2, right rectus femoris and right biceps femoris long head.* These subsets are also defined  
660 within the musint package.

661 In Table 5 we list the results of our 16 layer transformer model on these subsets.

Table 5: Human motion-to-muscle activation prediction results for the lower body model.

| Motion  | All muscles |      |        | Lower Body |      |        | Subset 16 |      |        | Subset 8 |      |        |
|---------|-------------|------|--------|------------|------|--------|-----------|------|--------|----------|------|--------|
|         | RMSE↓       | PCC↑ | SMAPE↓ | RMSE↓      | PCC↑ | SMAPE↓ | RMSE↓     | PCC↑ | SMAPE↓ | RMSE↓    | PCC↑ | SMAPE↓ |
| overall | 0.036       | 0.55 | 95.3   | 0.048      | 0.54 | 45.1   | 0.066     | 0.56 | 47.7   | 0.060    | 0.56 | 45.0   |
| jump    | 0.052       | 0.64 | 100.7  | 0.051      | 0.71 | 52.3   | 0.059     | 0.71 | 55.5   | 0.056    | 0.70 | 54.2   |
| kick    | 0.046       | 0.64 | 102.8  | 0.053      | 0.62 | 54.8   | 0.068     | 0.63 | 57.0   | 0.067    | 0.67 | 57.4   |
| stand   | 0.033       | 0.56 | 97.5   | 0.046      | 0.58 | 45.0   | 0.062     | 0.61 | 47.5   | 0.052    | 0.59 | 43.6   |
| walk    | 0.026       | 0.65 | 90.7   | 0.044      | 0.77 | 42.4   | 0.060     | 0.77 | 43.3   | 0.057    | 0.77 | 43.4   |
| jog     | 0.033       | 0.71 | 99.0   | 0.046      | 0.71 | 51.1   | 0.063     | 0.75 | 51.8   | 0.062    | 0.71 | 52.7   |
| dance   | 0.041       | 0.60 | 109.2  | 0.057      | 0.65 | 58.5   | 0.073     | 0.66 | 59.6   | 0.072    | 0.67 | 59.5   |

662 **A.5 Training on Muscles in Action**

663 We evaluate the generalizability of MinT by finetuning our 16-layer transformer architecture exclu-  
 664 sively on the first and last transformer block and comparing the results with full training from scratch  
 665 on Muscles in Action [9]. The motions in MIA were obtained with VIBE [32], a 3D pose estimation  
 666 method performed on 2D images. The resulting motions are very noisy in contrast to the motions in  
 667 AMASS which are the result of motion capture, inducing a significant domain gap. Table 6 shows  
 668 our results. We find that limiting our training to the first and last transformer block results in very  
 669 similar RMSE values compared to full fine-tuning, while PCC and SMAPE clearly displays a small  
 670 but significant advantage of the full fine-tuning strategy. Still, finetuning the first and last layer only  
 671 affects some 8% of all trainable weights, and we see this as an indication for the transferability of the  
 672 knowledge obtained by training on MinT.

Table 6: Human motion-to-muscle activation prediction results on Muscles in Action [9].

| Motion      | Full Fine-tuning |      |        | First and last layer |      |        |
|-------------|------------------|------|--------|----------------------|------|--------|
|             | RMSE↓            | PCC↑ | SMAPE↓ | RMSE↓                | PCC↑ | SMAPE↓ |
| Overall     | 15.11            | 0.27 | 37.0   | 15.15                | 0.21 | 41.6   |
| ElbowPunch  | 15.66            | 0.25 | 43.6   | 15.48                | 0.19 | 48.8   |
| FrontKick   | 8.49             | 0.19 | 34.5   | 8.20                 | 0.14 | 41.0   |
| FrontPunch  | 8.47             | 0.38 | 29.8   | 8.22                 | 0.36 | 36.3   |
| HighKick    | 13.09            | 0.35 | 37.0   | 12.94                | 0.29 | 39.7   |
| HookPunch   | 13.18            | 0.32 | 37.1   | 13.28                | 0.28 | 44.6   |
| JumpingJack | 13.79            | 0.27 | 28.5   | 13.42                | 0.23 | 29.5   |
| KneeKick    | 12.32            | 0.25 | 37.3   | 12.26                | 0.16 | 43.0   |
| LegBack     | 11.70            | 0.32 | 37.3   | 11.91                | 0.18 | 44.4   |
| LegCross    | 13.89            | 0.17 | 42.7   | 13.84                | 0.11 | 48.9   |
| RonddeJambe | 15.81            | 0.20 | 39.5   | 15.50                | 0.17 | 42.6   |
| Running     | 7.53             | 0.30 | 26.3   | 7.25                 | 0.24 | 27.4   |
| Shuffle     | 9.79             | 0.21 | 28.0   | 9.56                 | 0.13 | 30.5   |
| SideLunges  | 26.13            | 0.29 | 45.9   | 26.66                | 0.22 | 51.7   |
| SlowSkater  | 20.15            | 0.26 | 42.1   | 20.81                | 0.19 | 47.2   |
| Squat       | 22.68            | 0.26 | 44.9   | 22.76                | 0.21 | 48.2   |

673 **A.6 Additional qualitative examples for MinT**

674 In Figure 6 we listed two qualitative examples to display the muscle activation estimation quality of  
 675 our best model. In Figures 11 to 17 we display these two test set samples as well es an additional 48  
 676 randomly chosen samples from the test set.

677 **A.7 Corrections**

678 In line 266 and 267 we wrote

679           In the construction of the dataset, some design choices had to increase simulation  
 680           robustnees, [...]

681 while the correct text should be

682           In the construction of the dataset, some design choices were made to increase  
 683           simulation robustness, [...]



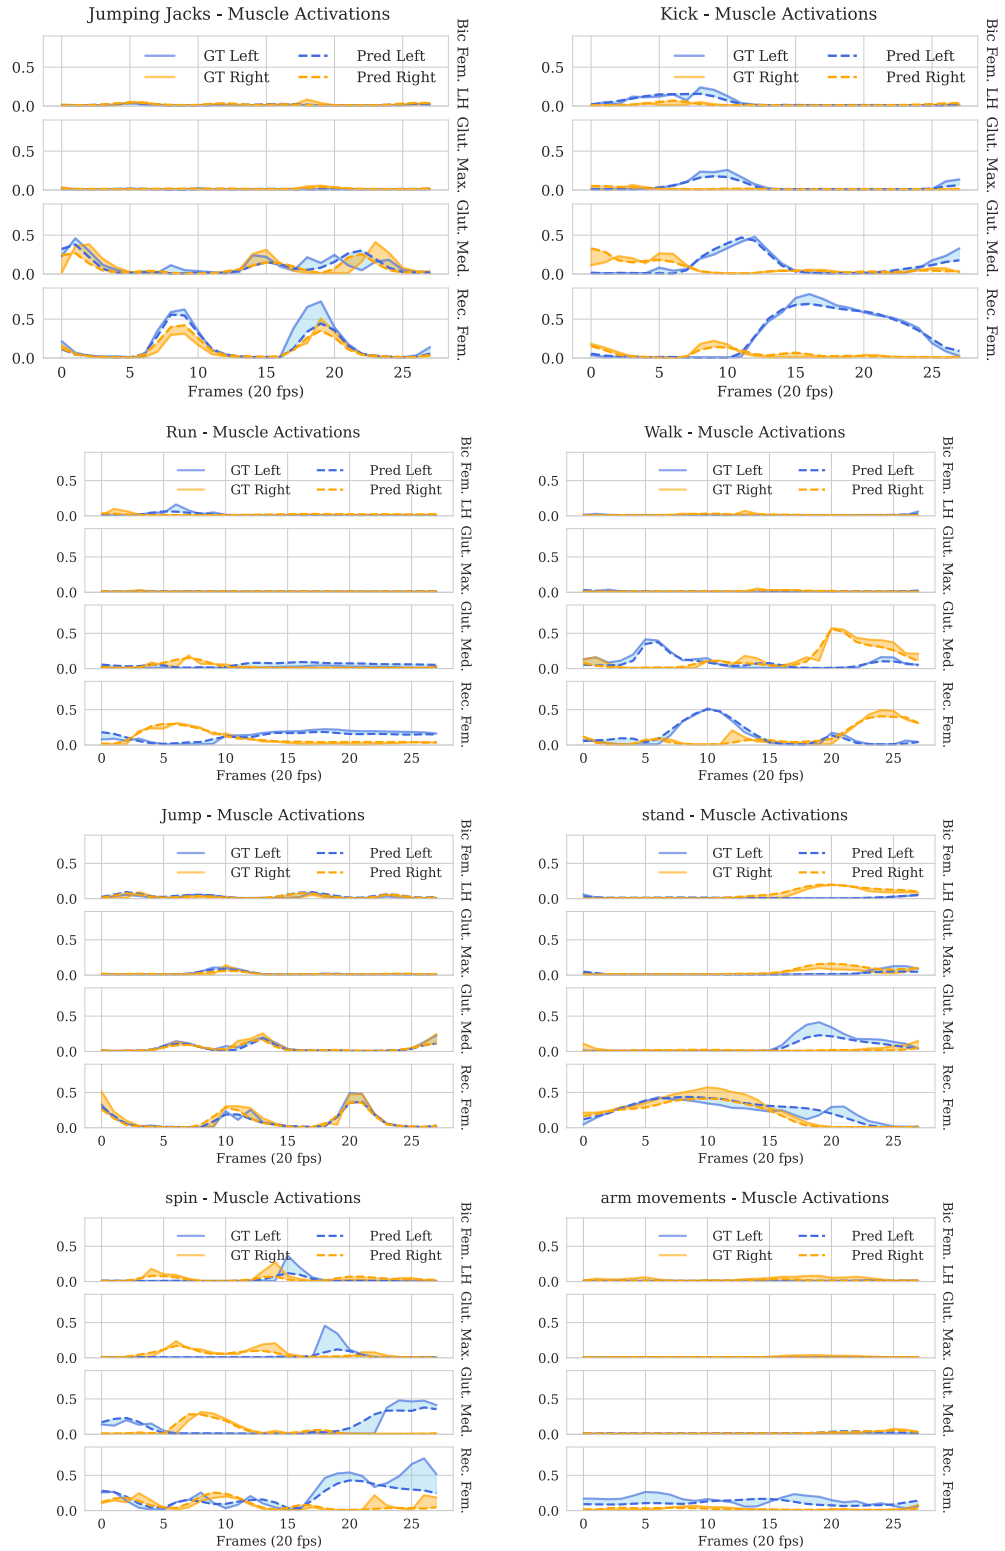

Figure 11: Muscle activation estimation with our 16 layer transformer model.

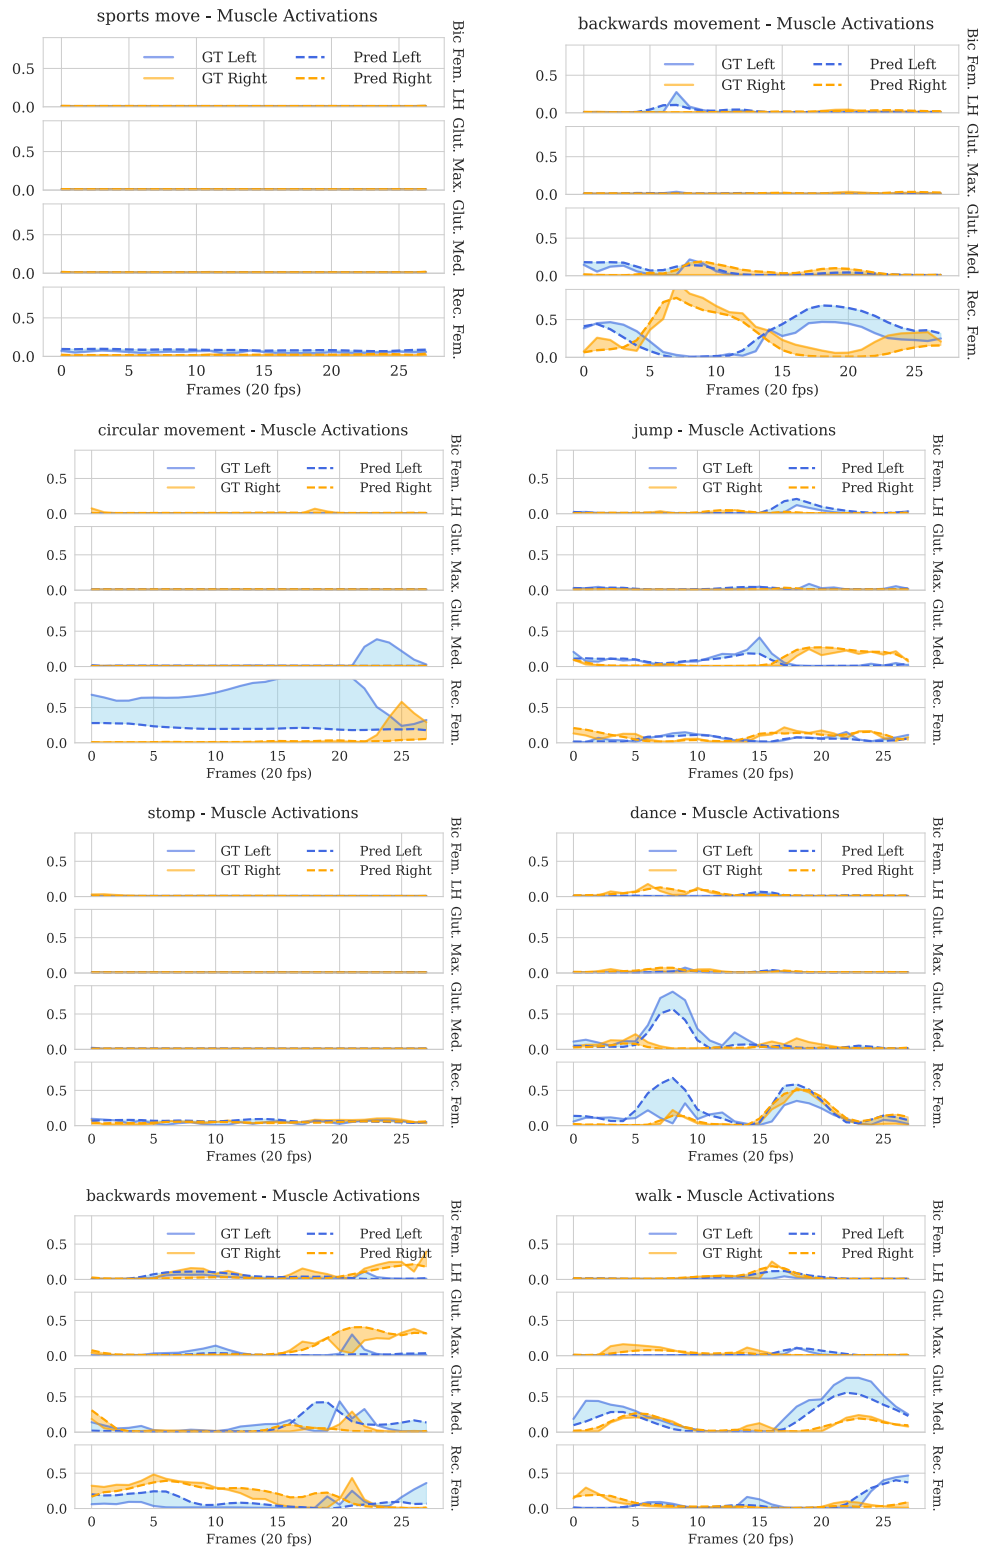

Figure 12: Muscle activation estimation with our 16 layer transformer model.

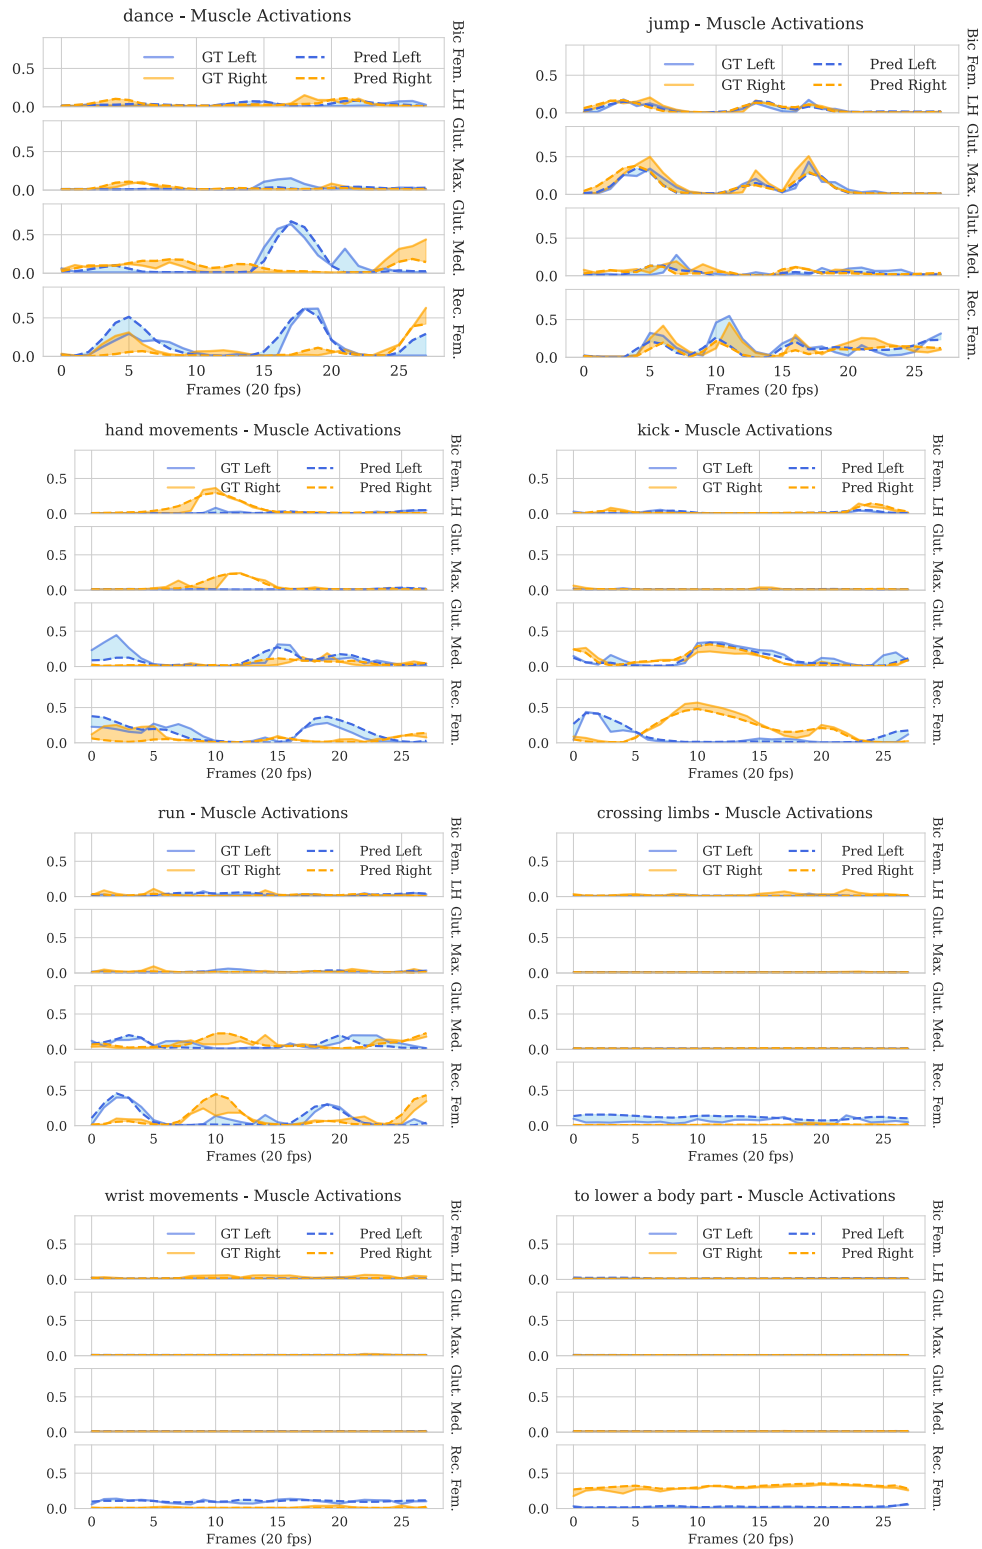

Figure 13: Muscle activation estimation with our 16 layer transformer model.

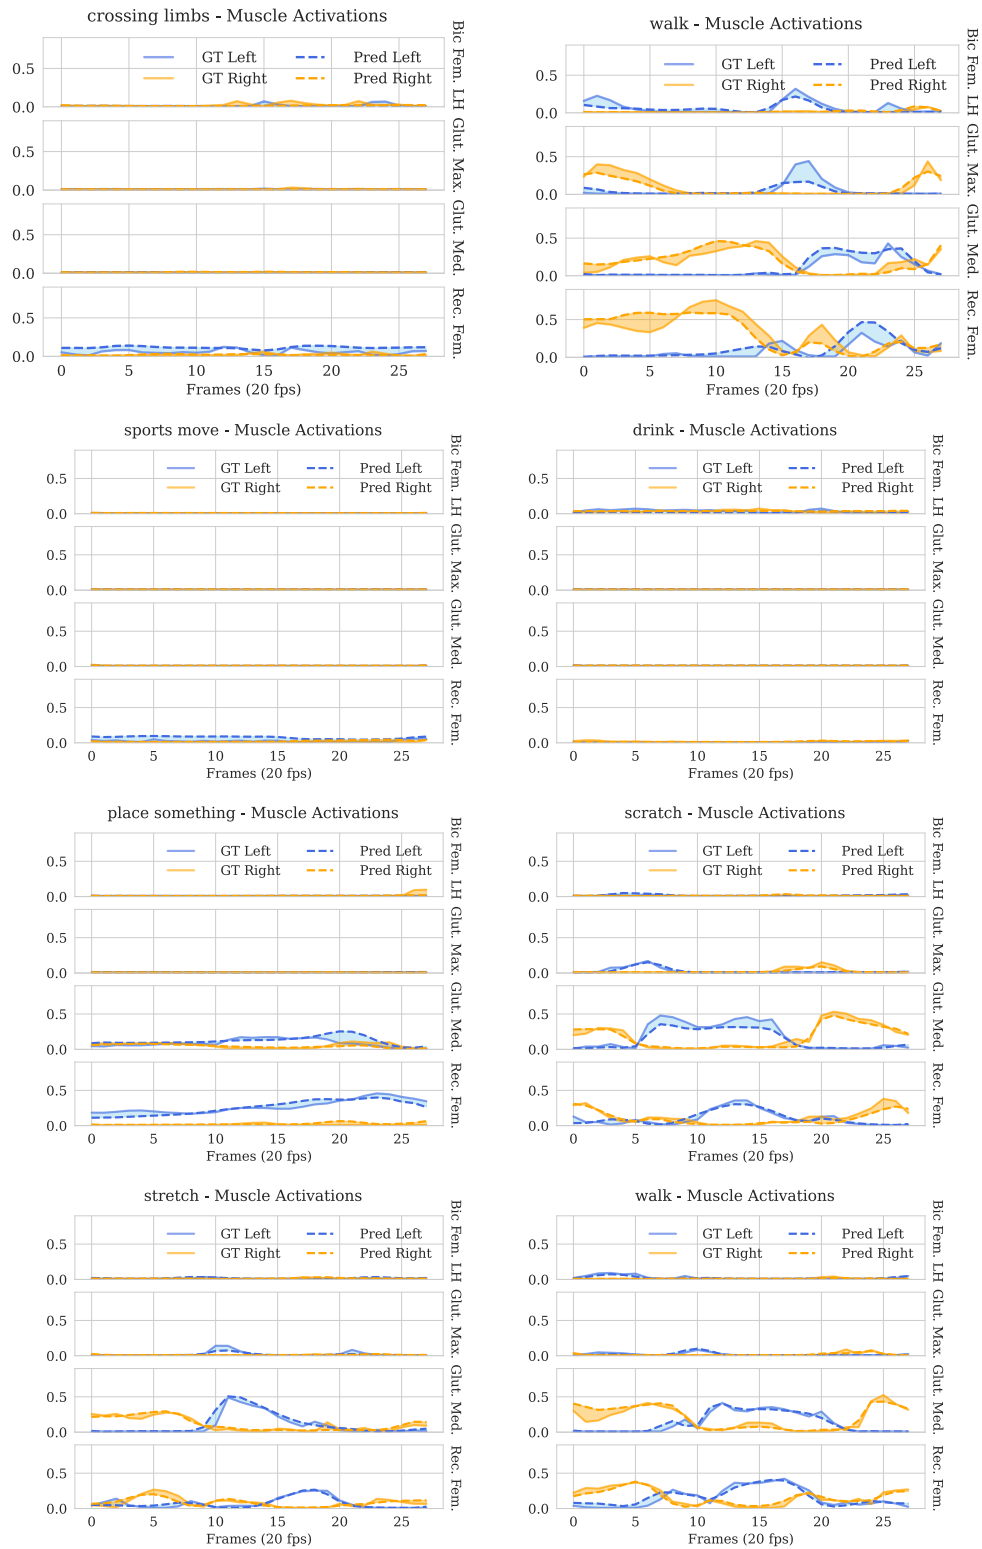

Figure 14: Muscle activation estimation with our 16 layer transformer model.

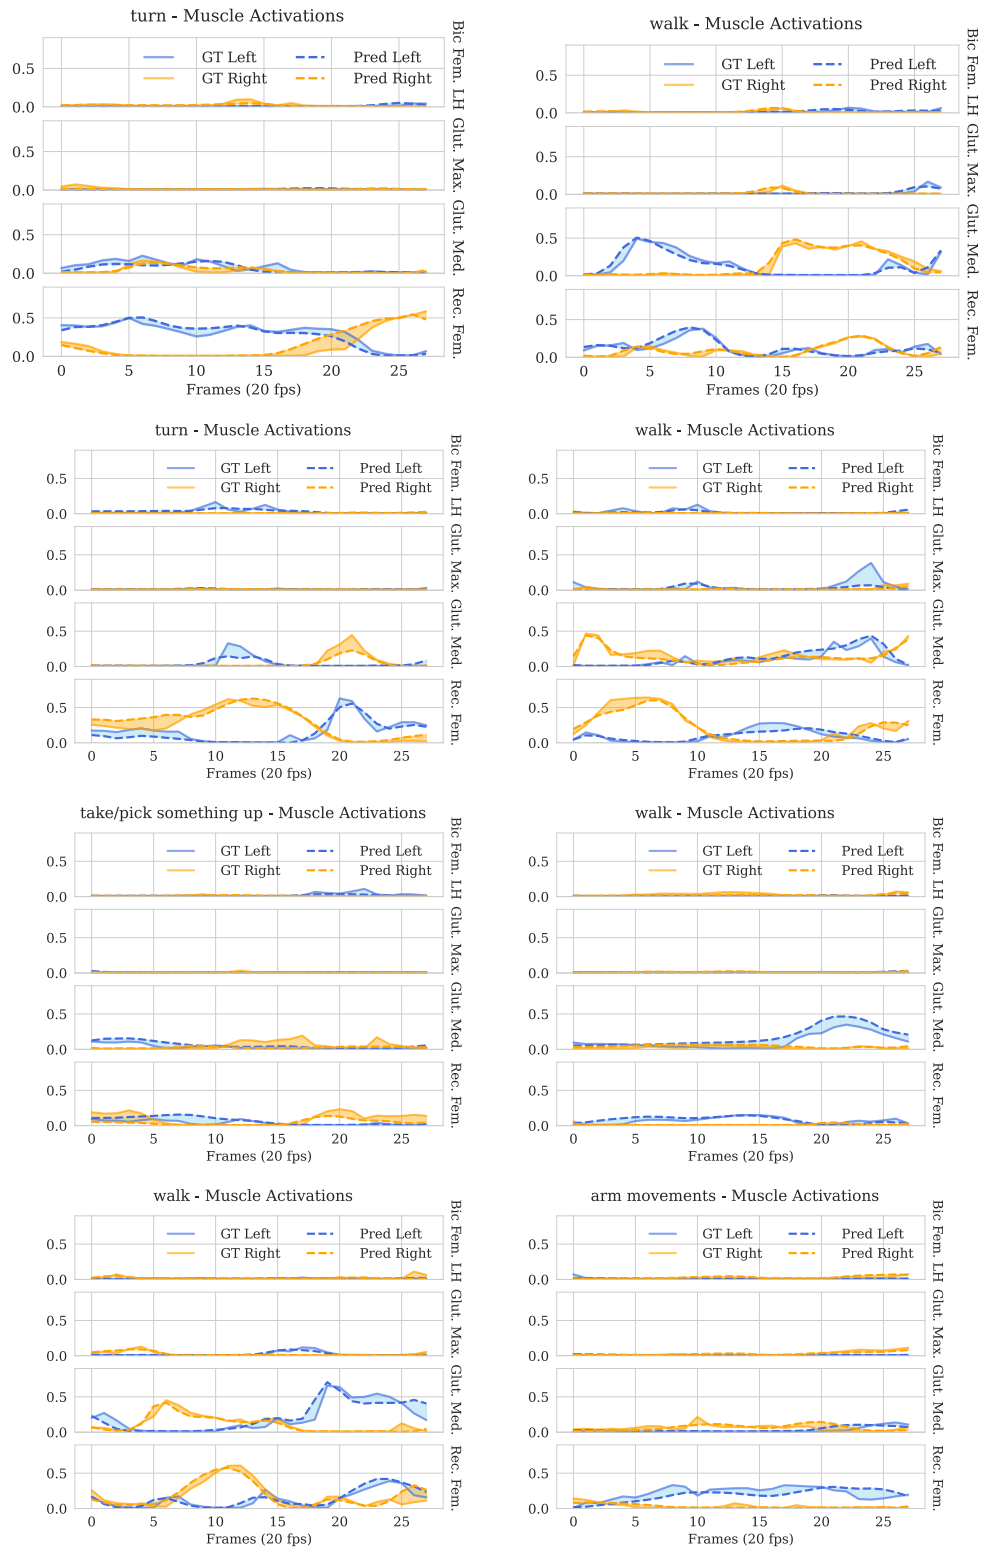

Figure 15: Muscle activation estimation with our 16 layer transformer model.

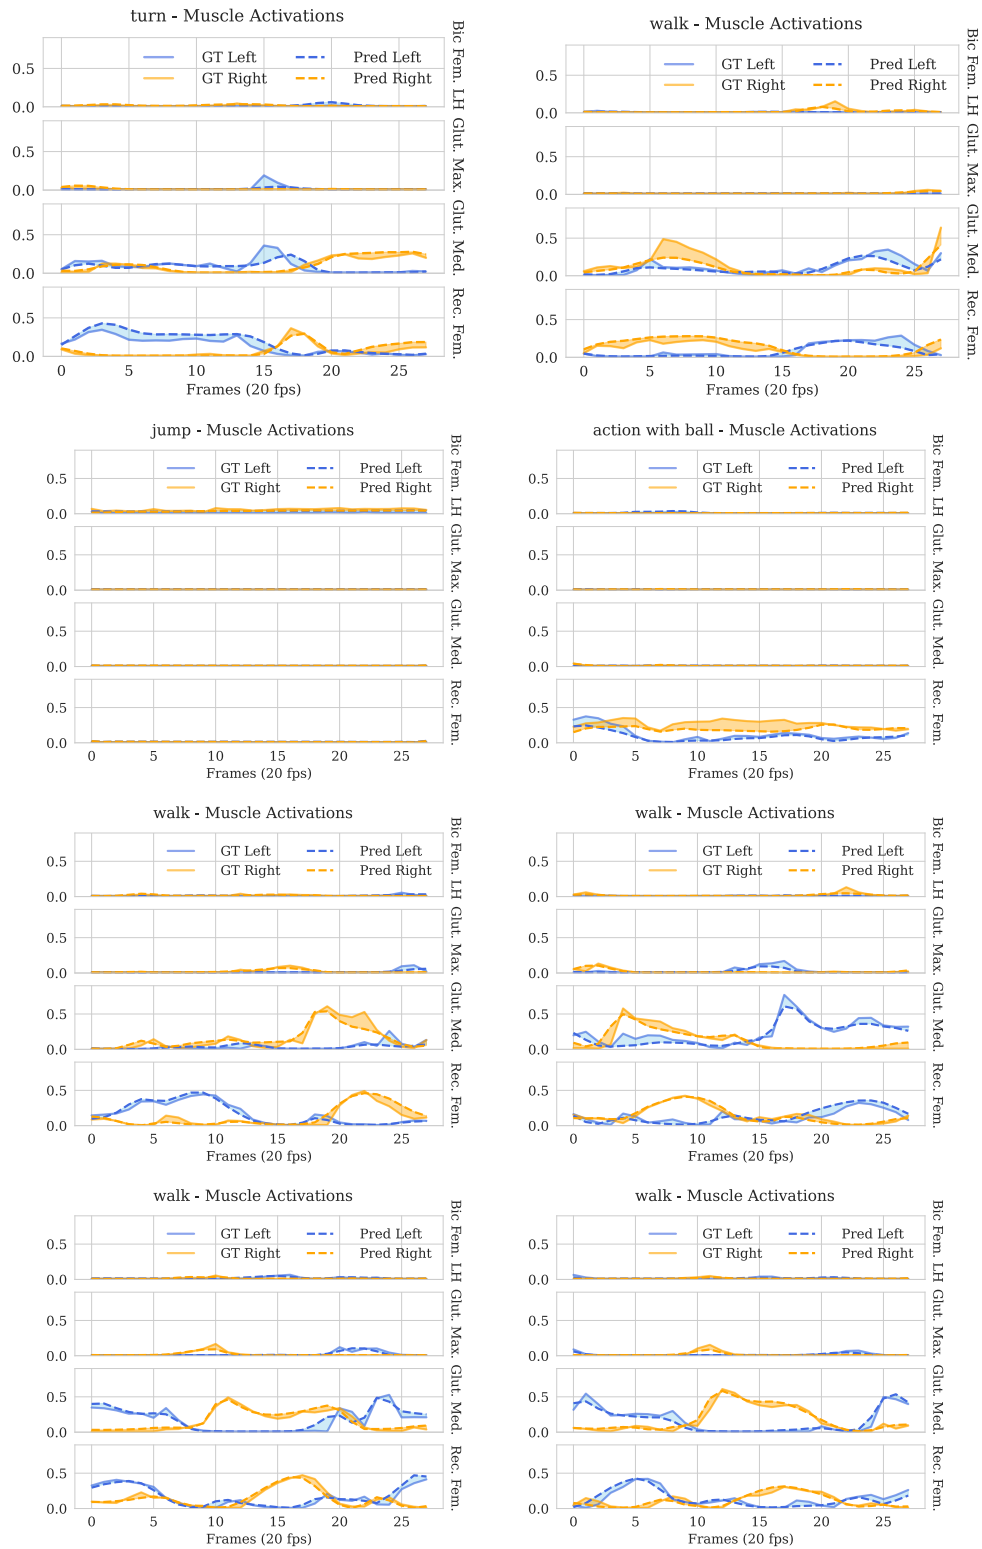

Figure 16: Muscle activation estimation with our 16 layer transformer model.

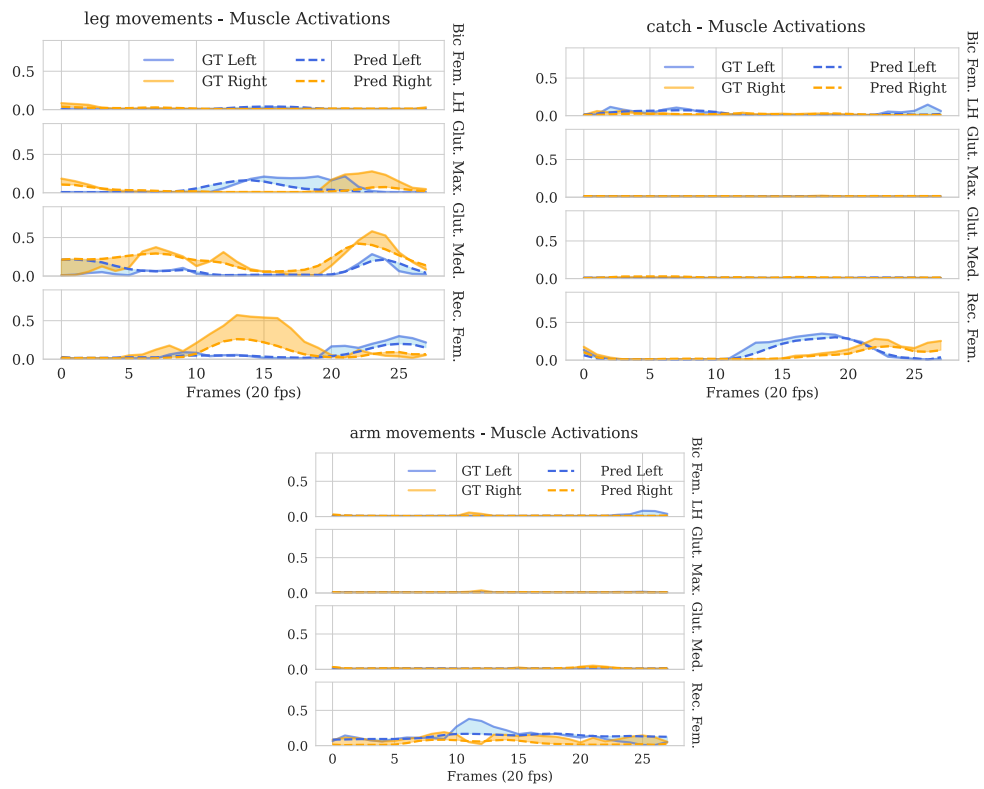

Figure 17: Muscle activation estimation with our 16 layer transformer model.
